# Supplementary material
Source: PubMed Central journal article supplement (PMC3021900)
Supplement: NIHMS28179-supplement-1.pdf [file NIHMS28179-supplement-1.pdf]

## **SUPPLEMENTARY FIGURE AND TABLE LEGENDS**

**Supplementary Figure 1.** A comparison of promoter methylation status, as determined by bisulphite sequencing and MSP, and expression fold-increase as determined by Affymetrix U133 plus 2 array analysis in RCC-derived cell lines following global demethylation. Upper panel: genes that were frequently methylated in sporadic RCC. Lower panel: Control genes that had relatively low expression increases and no promoter methylation in cell lines.

**Supplementary Figure 2.** Representative traces of direct bisulphite sequencing of tumour DNA. **H:** Hemi-methylation, **M:** Complete methylation

**Supplementary table 1.** Primers used for methylation analysis.

**Supplementary table 2.** Shortlist of genes (406) identified (see results for details of filtering procedure) following global demethylation of 11 RCC-derived cell lines and analysis of Affymetrix U133 plus 2 arrays. The numbers in the heat-map cells represent fold changes of expression after demethylation. The genes have been ordered into the following groups: Yellow: genes analysed in this study. Blue: genes previously known to be frequently methylated in RCC. Green: genes that we have previously analysed for promoter methylation and found low frequencies of methylation in RCC. Grey: genes with no promoter region CpG island present. Pink: genes that are not expressed in kidney tissue. Aqua: Genes not analysed thus far.

|         | COL14A1            |                        | BNC1               |                        | SFRP1              |                        | CST6               |                        | COL15A1            |                        | PDLIM4             |                        | GREM1              |                        | RPRM               |                        |
|---------|--------------------|------------------------|--------------------|------------------------|--------------------|------------------------|--------------------|------------------------|--------------------|------------------------|--------------------|------------------------|--------------------|------------------------|--------------------|------------------------|
|         | Methylation Status | Exp. Array Fold Change |
| SKRC45  | M                  | 26.19                  | M                  | 5.25                   | M                  | 14.11                  | M                  | 7.09                   | M                  | 3.45                   | M                  | 0.97                   | M                  | 603.73                 | U                  | 0.79                   |
| SKRC47  | M                  | 63.00                  | U                  | 0.96                   | U                  | 1.41                   | U                  | 1.40                   | M                  | 19.33                  | U                  | 0.61                   | U                  | 2.25                   | U                  | 1.78                   |
| SKRC39  | M                  | 33.70                  | U                  | 2.05                   | U                  | 1.46                   | U                  | 39.86                  | U                  | 2.68                   | U                  | 0.94                   | M                  | 240.00                 | M                  | 6.95                   |
| SKRC54  | M                  | 2.16                   | M                  | 7.48                   | U                  | 1.15                   | M                  | 3.46                   | M                  | 2.20                   | U                  | 12.60                  | M                  | 192.75                 | U                  | 1.53                   |
| KTCL26  | U                  | 1.62                   | U                  | 1.50                   | U                  | 1.65                   | M                  | 27.17                  | U                  | 1.36                   | U                  | 1.27                   | M                  | 66.11                  | M                  | 10.00                  |
| UMRC2   | M                  | 2.52                   | M                  | 27.40                  | U                  | 2.40                   | M                  | 38.79                  | U                  | 1.46                   | M                  | 16.60                  | U                  | 1.25                   | M                  | 4.19                   |
| UMRC3   | M                  | 6.67                   | U                  | 0.91                   | M                  | 14.88                  | U                  | 0.24                   | U                  | 0.08                   | U                  | 1.11                   | U                  | 1.65                   | U                  | 0.37                   |
| 786-0   | M                  | 0.69                   | M                  | 133.67                 | M                  | 22.00                  | M                  | 22.41                  | U                  | 2.21                   | M                  | 8.33                   | M                  | 143.20                 | U                  | 2.09                   |
| CAKI-1  | U                  | 1.67                   | U                  | 4.60                   | U                  | 0.28                   | M                  | 35.81                  | U                  | 0.06                   | M                  | 21.89                  | M                  | 4.41                   | U                  | 0.20                   |
| KTCL140 | M                  | 16.00                  | M                  | 222.00                 | U                  | 0.50                   | U                  | 10.50                  | M                  | 20.50                  | U                  | 2.80                   | M                  | 395.00                 | U                  | 0.39                   |
| RCC4    | M                  | 10.00                  | M                  | 20.12                  | U                  | 0.84                   | M                  | 30.77                  | M                  | 28.50                  | M                  | 7.05                   | M                  | 130.73                 | U                  | 0.32                   |

|         | LRCH1              |                        | FZD8               |                        | KLF2               |                        |
|---------|--------------------|------------------------|--------------------|------------------------|--------------------|------------------------|
|         | Methylation Status | Exp. Array Fold Change | Methylation Status | Exp. Array Fold Change | Methylation Status | Exp. Array Fold Change |
| SKRC45  | U                  | 0.92                   | U                  | 1.11                   | U                  | 3.10                   |
| SKRC47  | U                  | 2.25                   | U                  | 6.82                   | U                  | 2.59                   |
| SKRC39  | U                  | 4.00                   | U                  | 6.70                   | U                  | 3.24                   |
| SKRC54  | U                  | 0.11                   | U                  | 5.27                   | U                  | 0.85                   |
| KTCL26  | U                  | 0.91                   | U                  | 0.22                   | U                  | 1.11                   |
| UMRC2   | U                  | 0.50                   | U                  | 5.06                   | U                  | 0.83                   |
| UMRC3   | U                  | 0.38                   | U                  | 0.08                   | U                  | 0.98                   |
| 786-0   | U                  | 2.89                   | U                  | 0.46                   | U                  | 1.97                   |
| CAKI-1  | U                  | 0.62                   | U                  | 2.67                   | U                  | 1.67                   |
| KTCL140 | U                  | 0.61                   | U                  | 2.41                   | U                  | 1.36                   |
| RCC4    | U                  | 6.58                   | U                  | 2.89                   | U                  | 1.30                   |

M Methylated  
U Unmethylated

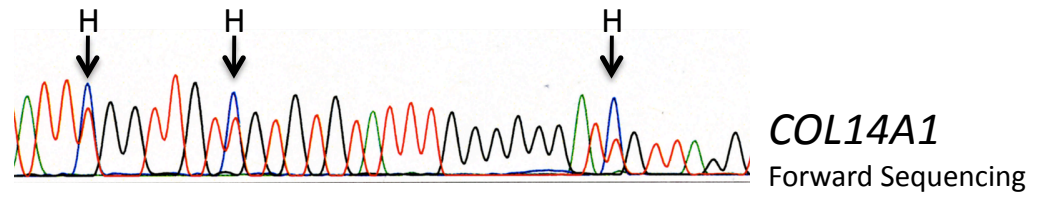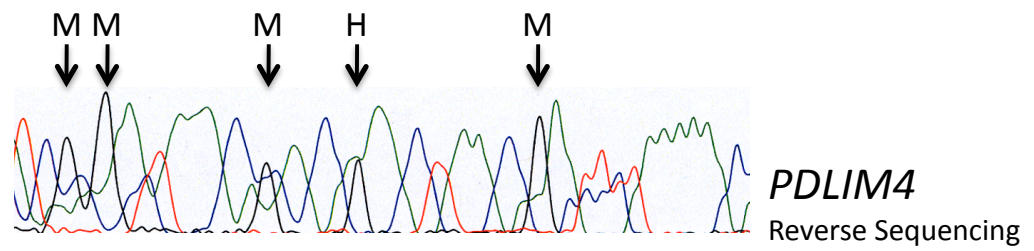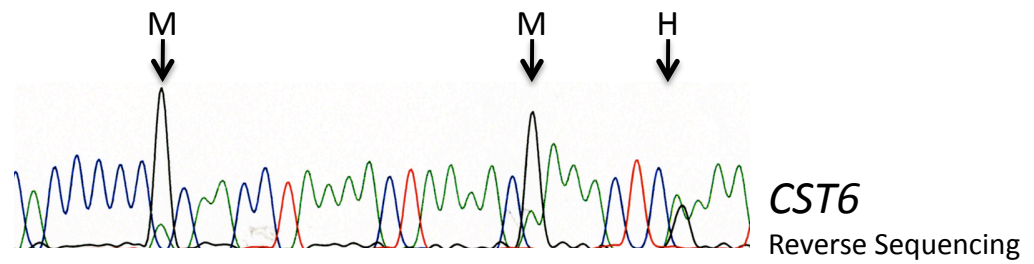

**Supplementary Figure 2.** Representative traces of direct bisulphite sequencing of tumour DNA.  
**H:** Hemi-methylation, **M:** Complete methylation.

Supplementary table 1

Nesteds primers for amplification and sequencing of bisulphite modified DNA  
(F: Forward, R: Reverse, I: Internal)

Col14a COBRA F: 5' g tat ata gta ttt gag aat agg agg gtt yga gat 3'

Col14a COBRA IF: 5' ggg ttt ggt ttg gga gtt tgt agt agt 3'

Col14a COBRA R: 5' c taa aac tac ctc crc ctc tcc aac taa 3'

CST6 COBRA F : 5' ttt tgt gaa tyg ttt ttg tat tgg tat ttg ttg t 3'

CST6 COBRA IR: 5' ata ccr tcr aaa ccc tca aaa ccr taa ata 3'

CST6 COBRA R: 5' ata cta tta cta ccc ata tta taa cta acc acr a 3'

COL15A1 COBRA F: 5' gta ttt agg agt tta gtg tag ttt ggg at 3'

COL15A1 COBRA IF: 5' gat ttt agt ttt ttt ggg ttg tgg aga gga ttt 3'

COL15A1 COBRA R: 5' cta crc act cac rcc cra aaa ata ccr a 3'

LOXL-1 COBRA F: 5' ggg tgg tgt tga tat ttt agt tty gtt ttg ttt gt 3'

LOXL-1 COBRA IF: 5' ttg tgg ttt ggt tgg gaa ttt tag gga t 3'

LOXL-1 COBRA R: 5' cra acr aac aaa acc rcc tat aaa cct tac ata a 3'

EMX2 COBRA F: 5' g aay gta tyg att ttg gga ttt yga ggt taa gyg 3'

EMX2 COBRA IF: 5' ggt tga tgg ggt ggg agg att tyg tat 3'

EMX2 COBRA R: 5' taa atc ccr aac cta cct crc cca aac taa 3'

PDLM4 COBRA F: 5' gy ggt ttg tag att taa ggt tyg agt agg att 3'

PDLM4 COBRA IF: 5' ggt ygt tyg aat gyg ggg att ttt gag agt 3'

PDLM4 COBRA R: 5' acr aaa acc cca aaa cra aaa ccc rcr caa 3'

GREM1 COBRA F: 5' gga gyg gaa aat gtg att tgt tgt gta ttt t 3'

GREM1 COBRA IF: 5' gtt tgg tta atg gag agg ygy ggt tt 3'

GREM COBRA IR: 5' ctc acc tat caa tac rac raa tcc tcr aaa 3'

GREM COBRA R: 5' cta crt ttc cct aca aac cca aaa caa cra aa 3'

Claudin 6 COBRA F: 5' tt tgt tag tty gag gyg ggt tta gyg att 3'

Claudin 6 COBRA IF: 5' gtt gty gtt agg gat agg gtt ttt gtt 3'

Claudin 6 COBRA R: 5' acr ttt aac cct taa aaa ccc cra aaa acc 3'

FZD8 COBRA F: 5' gty gag tgg tgg tyg tta ggg ttg att 3'

FZD8 COBRA IF: 5' g tat ygy ggt ttt aga gga aat ttg ygg ygt t 3'

FZD8 COBRA R: 5' ata atc taa aat ctc cct tat act tcr ccc raa 3'

MKK6 COBRA F: 5' ggg agt ttt ttt tay gga gat ygg ggt 3'

MKK6 COBRA IF: 5' ggg ttg gag gga att ggg aag tat tgt 3'

MKK6 COBRA R: 5' ac tac rtt crc rac cca acr ttc tcc caa 3'

Noggin COB F: 5' gt tag tgg ttt tta tgg tga tgg agt 3'

Noggin COB IF: 5' att taa agg ttt gga ttt tgy gag ata gat 3'

Noggin COB R: 5' caa ctc ctc tcc cra atc tac taa 3'

ITGBL1 COBRA F: 5' g cag ygt ttg gat ttt aga gag atg tgg gtt 3'

ITGBL1 COBRA IF: 5' ggg ttg tay gtt tgt att tgg agg gga tat 3'  
ITGBL1 COBRA R: 5' ccr tcr taa atc tcr cac acc cac tca taa 3'

ZFP42/REX-1 COBRA F: 5' ata gat att tat tga gyg ttt att ayg tgt t 3'  
ZFP42/REX-1 COBRA IR: 5' caa taa aaa crt aaa cta ccc tac rcc 3'  
ZFP42/REX-1 COBRA R: 5' cac tct act att tcc aat acc ac 3'

DMRTB1 COBRA IF: 5' gat gta gga att atg gtt ttt tgg tgt t 3'  
DMRTB1 COBRA R: 5' ac crc cca aaa ccr act aaa aaa ctc 3'  
DMRTB1 COBRA F: 5' t ggt tgt gtt ayg aag gtt gat ttt gtt 3'

KLF4 COBRA F: 5' g tgt ttt agt tgt tty ggg ttg tyg agg att 3'  
KLF4 COBRA IR: 5' cct crt tca ata act ctt aat aac ccc aaa ac 3'  
KLF4 COBRA R: 5' c ata cac aac taa acc aaa aac acr aaa act atc 3'

KLF2 COBRA F: 5' ggt ttt gta gtt ttt ttt gag gtt gga gtt 3'  
KLF2 COBRA IF: 5' gg tgt ttt ttt gag agt ttt tga gag gtt 3'  
KLF2 COBRA R: 5' c cra taa ata act acc cra aac cra act aa 3'  
KLF2 COBRA IR: 5' c cra taa ata act acc cra aac cra act aa 3'

HERC5 COBRA F: 5' atg ttt ygt ttt tta ttg gag ttg tag gtt 3'  
HERC5 COBRA R: 5' aca aca aaa tta acr crt cac ctc cac 3'  
HERC5 COBRA IR: 5' ccr cra crc taa aaa aaa acc aaa act ata 3'

LRCH4 COBRA F: 5' gtg tyg gtg ttt ttt ttt ttt ggt tgg att 3'  
LRCH4 COBRA IR: 5' aac cta aaa acc cra aca cra aaa tcr taa 3'  
LRCH4 COBRA R: 5' cac tca cca acc taa ata ata tct aac aaa 3'

PTGIS COBRA F: 5' gta ggg ttt tta ata gag ygt tty ggt ttg att 3'  
PTGIS COBRA IR: 5' ccr aaa atc tcr cct tac ccr aaa tac taa 3'  
PTGIS COBRA R: 5' ct tcc cac ctt aca cct tct taa caa 3'

RANBP2L1 COBRA F: 5' ttg aat tta ttt att att att gat agt tta ggt t 3'  
RANBP2L1 COBRA IF: 5' aag gtt ttt tat aga taa gat tat gtt aag ata tt 3'  
RANBP2L1 COBRA R: 5' aca atc rcc act tcc aaa aaa aaa ata 3'

FBXO2 COBRA F: 5' at tyg gaa ttt agg agt ttt tty ggt agt t 3'  
FBXO2 COBRA IF: 5' ta tga tty gtt ggg tyg ttt aag ttg tat 3'  
FBXO2 COBRA R: 5' cta aaa aaa aat ccr att taa aac atc tcr caa 3'

TLL1 COBRA F: 5' g gtt tta gyg ttt ttt gtt gtt gta att tgt aat 3'  
TLL1 COBRA IF: 5' gt agt ttt gag gat ttt agt ttt tag taa aat 3'  
TLL COBRA R: 5' cat aca atc aaa atc aaa atc cra acc aca a 3'

DiCKKOPF-1 COBRA F: 5' ggg tat tta agt ttt tag agt ttt tgt tgt 3'  
DiCKKOPF-1 COBRA IF: 5' gta gtt ttt att tyg aag atg agt ygg gtt 3'  
DiCKKOPF-1 COBRA R: 5' caa aat aac rct cac tcc caa caa aaa ata a 3'

SYCP3 COBRA F: 5' ttg gaa ggt att agg ttt taa gtg tat 3'

SYCP3 COBRA R: 5' ta aac cct atc cta ctc aaa acc cta 3'  
SYCP3 COBRA IR: 5' c aaa aac aac ctc taa cct aaa cac cta 3'

Methylation Specific primers to amplify Col15A promoter region:

Col15a MSPF: 5' gg ttg tgg aga gga ttt ttt tag cg 3'  
Col15a USPF: 5' ggg ttg tgg aga gga ttt ttt tag tg 3'  
Col15a MSPR: 5' tc tac tac ctc cac ccg cg 3'  
Col15a USPR: 5' ctc tac tac ctc cac cca ca 3'

| Probe        | SK45   | SK47  | SK39   | SK54  | KT48   | UM2    | UM3   | 13860  | CAK1  | KT140  | RCC4  | Gene Symbol | Chromosomal Location | RefSeq Transcript ID |
|--------------|--------|-------|--------|-------|--------|--------|-------|--------|-------|--------|-------|-------------|----------------------|----------------------|
| 1552487_s.at | 5.25   | 0.96  | 2.05   | 7.26  | 1.50   | 27.40  | 0.91  | 736.67 | 4.60  | 222.00 | 20.12 | BNCL1       | chr15q25.2           | NM_017177            |
| 205827_at    | 17.30  | 18.00 | 114.67 | 29.29 | 23.44  | 16.74  | 1.11  | 12.91  | 2.55  | 95.50  | 17.54 | SCYA20      | chr1p36.2            | NM_017185            |
| 237810_at    | 0.48   | 1.29  | 36.62  | 2.21  | 2.12   | 16.64  | 0.12  | 15.10  | 20.29 | 25.22  | 66.94 | CLDN6       | chr16p13.3           | NM_012195            |
| 121865_s.at  | 26.19  | 63.00 | 30.70  | 2.16  | 1.62   | 2.52   | 6.67  | 0.69   | 1.67  | 1.09   | 10.00 | COL14A1     | chr8q23              | NM_021110            |
| 203477_at    | 3.45   | 19.33 | 3.68   | 2.20  | 1.36   | 1.46   | 0.68  | 2.21   | 0.66  | 20.50  | 28.50 | COL15A1     | chr9q21-q22          | NM_018555            |
| 206959_at    | 7.09   | 1.40  | 39.66  | 3.64  | 27.17  | 38.79  | 1.24  | 28.41  | 35.81 | 10.50  | 30.17 | CSF2        | chr11q13             | NM_013233            |
| 204602_at    | 3.75   | 1.30  | 2.64   | 28.10 | 2.16   | 2.68   | 1.24  | 36.44  | 4.07  | 14.38  | 1.97  | DKK1        | chr10q11.2           | NM_012242            |
| 240313_at    | 6.74   | 17.38 | 55.16  | 5.17  | 12.56  | 10.25  | 0.85  | 8.25   | 9.94  | 3.81   | 7.85  | DMRTB1      | chr1p32.3            | NM_033067            |
| 221950_at    | 0.46   | 2.14  | 0.25   | 1.50  | 5.00   | 3.25   | 14.25 | 27.50  | 32.67 | 0.22   | 0.48  | EMX2        | chr10q26.1           | NM_014098            |
| 206818_at    | 1.39   | 89.67 | 12.91  | 14.67 | 20.05  | 26.57  | 0.31  | 0.67   | 1.79  | 13.48  | 0.45  | FOXP1       | chr14q12-q13         | NM_005249            |
| 181848_s.at  | 322.25 | 25.00 | 24.65  | 38.08 | 9.93   | 1.60   | 91.17 | 464.33 | 8.67  | 230.33 | 30.29 | GREM1       | chr15q13-15          | NM_013372            |
| 205422_s.at  | 11.77  | 1.44  | 1.70   | 1.09  | 5.65   | 2.00   | 4.47  | 50.67  | 1.74  | 2.09   | 32.09 | ITGBL1      | chr13p33             | NM_004791            |
| 202266_s.at  | 2.68   | 0.68  | 12.40  | 1.14  | 10.68  | 1.44   | 0.84  | 2.72   | 2.35  | 2.15   | 10.20 | KLF4        | chr9q31              | NM_013233            |
| 203370_at    | 0.46   | 0.42  | 36.00  | 1.11  | 0.32   | 2.25   | 1.39  | 0.61   | 23.60 | 13.60  | 2.33  | LOXL1       | chr17q24             | NM_005576            |
| 231798_at    | 2.88   | 1.03  | 5.99   | 26.57 | 1.36   | 1.79   | 1.36  | 3.32   | 1.69  | 12.40  | 11.17 | NOG         | chr15q21-q22         | NM_005450            |
| 121564_s.at  | 0.97   | 0.61  | 0.94   | 12.60 | 1.27   | 16.68  | 0.11  | 8.33   | 2.89  | 2.80   | 7.52  | PDLIM4      | chr5q31.2            | NM_003687            |
| 208131_s.at  | 0.36   | 57.33 | 7.37   | 10.66 | 3.27   | 20.38  | 0.74  | 9.11   | 21.00 | 5.50   | 27.52 | PTGIS       | chr20p13.13          | NM_006961            |
| 206392_s.at  | 1.38   | 25.50 | 40.00  | 1.67  | 1.44   | 71.50  | 3.33  | 1.50   | 7.51  | 0.43   | 0.59  | RARRRS1     | chr3q25.32           | NM_208663            |
| 211324_s.at  | 0.17   | 0.33  | 10.00  | 1.13  | 19.00  | 5.00   | 1.27  | 2.52   | 1.00  | 1.68   | 22.75 | RPGD5       | chr2p13              | NM_005054            |
| 202037_s.at  | 14.11  | 1.41  | 1.46   | 1.15  | 1.65   | 2.40   | 14.88 | 22.00  | 0.28  | 0.50   | 0.84  | SFRP1       | chr8p12-q11          | NM_003012            |
| 206415_at    | 3.83   | 18.00 | 7.00   | 0.02  | 0.42   | 0.04   | 13.00 | 0.50   | 1.00  | 10.25  | 1.17  | TLL1        | chr4q32-p33          | NM_012464            |
| 204083_s.at  | 6.58   | 1.04  | 4.48   | 7.29  | 3.91   | 107.82 | 0.59  | 42.14  | 0.57  | 28.25  | 45.44 | TPM2        | chr1p13              | NM_218674            |
| 202233_s.at  | 13.27  | 1.21  | 0.71   | 74.45 | 1.13   | 80.82  | 1.05  | 1.12   | 0.22  | 0.90   | 0.99  | UCRHR       | chr1p33              | NM_006004            |
| 154776_at    | 0.45   | 20.00 | 2.63   | 0.56  | 29.33  | 0.52   | 0.78  | 1.59   | 66.47 | 21.40  | 1.10  | ZFP42       | chr4q35.2            | NM_174900            |
| 214936_at    | 0.92   | 2.25  | 4.00   | 0.11  | 0.91   | 0.50   | 0.38  | 2.89   | 0.62  | 0.61   | 6.58  | LRRH1       | chr13q14.13          | NM_015116            |
| 216587_s.at  | 1.11   | 6.82  | 6.70   | 5.27  | 0.22   | 5.06   | 0.98  | 0.46   | 2.67  | 2.41   | 2.89  | FZD8        | chr10p11.23          | NM_013866            |
| 219371_s.at  | 3.10   | 2.59  | 3.24   | 0.85  | 1.11   | 0.83   | 0.98  | 1.97   | 1.67  | 1.36   | 1.30  | KLH2        | chr19p13.13          | NM_016270            |
| 219370_at    | 0.79   | 1.78  | 6.95   | 15.53 | 10.00  | 1.19   | 0.37  | 2.09   | 2.00  | 0.39   | 0.32  | REPRIMO     | chr2q23.3            | NM_009485            |
| 155499_s.at  | 9.48   | 2.79  | 10.94  | 20.22 | 18.01  | 41.77  | 1.04  | 19.07  | 8.76  | 69.61  | 32.56 | COL1A1      | chr17q21.33          | NM_010088            |
| 205302_at    | 11.79  | 32.76 | 3.36   | 0.56  | 2.73   | 2.72   | 1.86  | 1.18   | 1.85  | 0.89   | 13.77 | IGFBP1      | chr7p12-p12          | NM_000596            |
| 201650_at    | 33.75  | 8.33  | 216.00 | 0.83  | 174.13 | 99.00  | 1.05  | 1.75   | 1.18  | 317.00 | 0.87  | KRT19       | chr17q12.1           | NM_002271            |
| 208352_x.at  | 1.00   | 1.62  | 1.18   | 6.17  | 0.72   | 0.28   | 1.09  | 31.50  | 13.13 | 15.45  | 22.38 | ANKK1       | chr8p11.1            | NM_020481            |
| 205780_at    | 5.00   | 3.73  | 17.85  | 2.96  | 2.21   | 5.66   | 1.11  | 9.25   | 6.69  | 35.29  | 10.40 | BIK         | chr22q13.31          | NM_001197            |
| 202790_at    | 6.06   | 6.00  | 68.45  | 58.67 | 39.63  | 4.07   | 0.53  | 28.08  | 10.33 | 7.86   | 4.02  | CLDN7       | chr17p13             | NM_001307            |
| 206806_at    | 18.06  | 17.00 | 1.51   | 4.55  | 1.17   | 1.67   | 2.07  | 4.49   | 5.54  | 7.88   | 4.02  | DNK1        | chr7q32.3            | NM_004717            |
| 204273_at    | 35.06  | 20.00 | 18.50  | 0.20  | 27.00  | 3.00   | 1.50  | 0.50   | 1.65  | 1.56   | 1.00  | EDNBP1      | chr13q22             | NM_003991            |
| 201809_s.at  | 6.97   | 1.53  | 1.60   | 1.37  | 1.47   | 16.39  | 1.03  | 101.14 | 1.26  | 46.08  | 1.10  | ENG         | chr9q33-q34.1        | NM_000118            |
| 215058_at    | 1.50   | 1.00  | 39.32  | 2.04  | 0.88   | 5.36   | 0.22  | 12.44  | 3.12  | 45.18  | 15.11 | IGFBP4      | chr17q12-q21.1       | NM_015152            |
| 1554252_x.at | 36.00  | 0.11  | 0.62   | 1.50  | 0.56   | 11.17  | 1.79  | 1.86   | 1.19  | 20.75  | 1.39  | LASS3       | chr15q26.3           | NM_178942            |
| 202096_at    | 5.43   | 2.94  | 5.20   | 1.37  | 2.47   | 10.91  | 0.23  | 20.85  | 4.33  | 78.89  | 1.88  | MDA2        | chr21q25.3           | NM_002462            |
| 229494_s.at  | 12.50  | 0.22  | 13.75  | 7.00  | 12.50  | 1.56   | 1.10  | 0.06   | 0.08  | 11.20  | 0.22  | PHLDA2      | chr11p15.5           | NM_003311            |
| 206772_at    | 37.00  | 29.20 | 1.03   | 47.20 | 1.46   | 4.41   | 80.50 | 4.69   | 10.15 | 35.00  | 19.60 | PTHFR       | chr2q33              | NM_005048            |
| 219395_at    | 1.52   | 2.86  | 1.87   | 12.73 | 9.84   | 3.36   | 0.97  | 2.59   | 1.99  | 32.76  | 1.16  | FBM35B      | chr2q33              | NM_029399            |
| 213921_at    | 0.88   | 2.50  | 12.68  | 69.54 | 6.94   | 0.68   | 0.80  | 8.05   | 4.00  | 15.12  | 32.81 | SST         | chr9q28              | NM_001408            |
| 1553599_s.at | 13.04  | 15.31 | 45.56  | 12.48 | 28.89  | 11.04  | 8.07  | 12.54  | 12.93 | 32.38  | 11.88 | SYCP3       | chr12q               | NM_153694            |
| 213969_x.at  | 11.75  | 3.01  | 11.34  | 9.90  | 24.39  | 15.26  | 0.94  | 16.90  | 6.42  | 39.88  | 10.32 | THY1        | chr11q22.31          | NM_006288            |
| 230193_at    | 11.18  | 11.81 | 14.28  | 2.90  | 2.99   | 3.83   | 1.16  | 220.50 | 47.67 | 83.65  | 28.52 | WDR66       | chr12q24.33          | NM_146688            |
| 1564307_s.at | 0.38   | 8.20  | 0.07   | 1.43  | 7.07   | 4.78   | 1.10  | 32.60  | 1.45  | 12.50  | 12.30 | AZM1L       | chr12p13.31          | NM_146770            |
| 207583_at    | 0.56   | 0.52  | 3.09   | 4.70  | 3.00   | 1.20   | 27.67 | 1.65   | 1.07  | 28.50  | 41.50 | ABD2        | chr17q12-q11         | NM_005164            |
| 237374_at    | 2.00   | 2.00  | 24.50  | 10.10 | 8.22   | 8.25   | 2.09  | 1.73   | 8.17  | 10.63  | 26.00 | ABHD18B     | chr14q22.1           | NM_181533            |
| 1568970_at   | 13.00  | 0.05  | 1.33   | 1.63  | 0.26   | 10.00  | 14.00 | 1.26   | 12.83 | 1.36   | 2.89  | ADAM12      | chr8p11.22           | NM_014237            |
| 201792_at    | 32.08  | 0.36  | 10.73  | 10.33 | 1.49   | 0.79   | 3.82  | 0.52   | 43.14 | 3.32   | 1.91  | AEBP1       | chr7p13              | NM_001291            |
| 210081_at    | 0.22   | 0.51  | 1.53   | 0.03  | 0.91   | 12.33  | 21.83 | 0.50   | 1.52  | 14.60  | 0.92  | AGER        | chr6p21.3            | NM_172197            |
| 209173_at    | 12.71  | 3.50  | 39.00  | 2.69  | 5.00   | 1.75   | 0.43  | 44.29  | 0.98  | 2.00   | 0.62  | AGR2        | chr7p21.3            | NM_006408            |
| 1560098_at   | 0.03   | 31.00 | 0.33   | 1.24  | 21.50  | 0.34   | 0.33  | 3.50   | 54.00 | 0.65   | 10.00 | AKR1C2      | chr10p15-p14         | NM_001354            |
| 1562261_at   | 1.18   | 4.22  | 5.88   | 1.70  | 10.25  | 0.56   | 2.86  | 3.61   | 1.03  | 10.74  | 23.67 | AMZ1        | chr7p22.2            | NM_133463            |
| 239183_at    | 20.50  | 2.43  | 1.18   | 1.94  | 22.00  | 2.75   | 0.60  | 0.60   | 1.06  | 40.00  | 0.66  | ANGPT1      | chr1q25.2            | NM_004673            |
| 1564000_at   | 1.43   | 0.48  | 10.50  | 12.67 | 1.33   | 1.00   | 5.50  | 20.40  | 1.36  | 7.00   | 3.33  | ANKRD31     | chr5q13              | XM_827671            |
| 203074_at    | 2.99   | 1.53  | 7.29   | 2.19  | 5.49   | 18.33  | 0.74  | 9.40   | 6.62  | 17.11  | 84.49 | ANXA8       | chr10q11.2           | NM_016390            |
| 252691_at    | 48.00  | 23.67 | 26.33  | 5.00  | 3.00   | 182.00 | 2.83  | 1.96   | 27.00 | 175.00 | 1.00  | ARL1        | chr13q14.3           | NM_138450            |
| 214498_at    | 11.27  | 10.13 | 19.57  | 2.38  | 1.43   | 12.09  | 1.50  | 3.53   | 2.66  | 3.63   | 1.00  | ARL9        | chr4q12              | NM_206919            |
| 235503_at    | 72.00  | 3.33  | 19.61  | 1.25  | 20.86  | 5.50   | 2.35  | 26.18  | 14.14 | 5.78   | 8.77  | ASB5        | chr4q42.2            | NM_080874            |
| 214498_at    | 11.80  | 8.50  | 3.34   | 3.94  | 1.08   | 11.25  | 0.61  | 2.00   | 27.20 | 11.57  | 0.15  | ASIP        | chr20q12-q12-q12     | NM_016272            |
| 206783_at    | 0.19   | 0.11  | 12.18  | 4.67  | 0.71   | 9.50   | 0.56  | 2.43   | 4.32  | 20.13  | 12.40 | B3GNT8      | chr19q13.2           | NM_198540            |
| 1561263_at   | 1.47   | 9.38  | 0.08   | 0.82  | 0.35   | 19.25  | 12.50 | 14.00  | 0.18  | 3.68   | 20.74 | C10orf3     | chr5p13.3            | NM_181435            |
| 204865_at    | 1.62   | 1.27  | 69.40  | 2.10  | 1.99   | 11.43  | 0.29  | 2.11   | 3.09  | 28.65  | 10.25 | CA3         | chr8p13-q22          | NM_005181            |
| 228083_at    | 4.46   | 4.45  | 34.00  | 32.67 | 0.69   | 3.58   | 1.05  | 11.15  | 1.14  | 11.94  | 0.74  | CACNA2D4    | chr12p13.33          | NM_172364            |
| 155554_s.at  | 0.17   | 0.26  | 0.13   | 10.60 | 2.29   | 1.50   | 1.00  | 1.00   | 11.80 | 4.00   | 19.33 | CADM2       | chr3p12              | NM_153184            |
| 234804_at    | 0.96   | 2.36  | 0.22   | 1.09  | 0.08   | 1.87   | 16.57 | 18.00  | 10.08 | 1.11   | 1.00  | CCL26       | chr18p12.33          | NM_133459            |
| 223710_at    | 1.78   | 0.90  | 1.24   | 2.14  | 3.30   | 5.88   | 1.74  | 41.00  | 3.00  | 15.00  | 10.71 | CCBE1       | chr7q11.23           | NM_006072            |
| 205114_s.at  | 22.14  | 5.65  | 3.78   | 2.26  | 1.99   | 15.33  | 0.58  | 18.42  | 9.00  | 23.46  | 1.07  | CCL5        | chr17q12-q12         | NM_002985            |
| 14051_s.at   | 38.07  | 33.75 | 2.71   |       |        |        |       |        |       |        |       |             |                      |                      |
